# Supplementary material
Source: PubMed Central journal article supplement (PMC4750387)
Supplement: NIHMS749099-supplement-4.pdf [file NIHMS749099-supplement-4.pdf]

## **Supplemental Information Inventory**

### **1. Supplemental Figures and Legends**

- Figure S1 (Related to Figure 1). Expression pattern of Hdac3 during lung development and assessment of cell proliferation and survival in the *Shh<sup>cre</sup>:Hdac3<sup>ff</sup>* mutant lungs.
- Figure S2 (Related to Figure 2). Examination of cell differentiation marker gene expression in *Shh<sup>cre</sup>:Hdac3<sup>ff</sup>* mutant lungs.
- Figure S3 (Related to Figure 3). qPCR analysis on isolated primary epithelial cells and the miRNA expression in the mesenchymal cells of *Shh<sup>cre</sup>:Hdac3<sup>ff</sup>* mutant lungs.
- Figure S4 (Related to Figure 4). qPCR analysis on the Tgf- $\beta$  pathway in the mesenchyme of *Shh<sup>cre</sup>:Hdac3<sup>ff</sup>* mutant lungs and the effect of SB431542 and Tgf- $\beta$  on p-Smad2 expression.
- Figure S5 (Related to Figure 5). Over-expression of miR-17-92 by the *R26<sup>MIR17-92</sup>* allele does not affect epithelial progenitor marker expression.
- Figure S6 (Related to Figure 6). Loss of epithelial miR-17-92 alleviates the defects of lung sacculation in the *Shh<sup>cre</sup>:Hdac3<sup>ff</sup>* mutant lungs.

### **2. Supplemental Movies**

- Movie S1 (Related to Figure 1). 3D reconstruction of Aqp5 whole mount staining showing the distal saccular region of an E18.5 control lung.
- Movie S2 (Related to Figure 1). 3D reconstruction of Aqp5 whole mount staining showing the distal saccular region of an E18.5 *Shh<sup>cre</sup>:Hdac3<sup>ff</sup>* mutant lung.

### **3. Supplemental Tables**

- Table S1 (Related to Figure 3). A list of all the differentially expressed genes in the microarray comparing control lungs and *Shh<sup>cre</sup>:Hdac3<sup>flf</sup>* mutant lungs at E18.5.
- Table S2 (Related to Figure 3). Result of SPIA pathway analysis on the common predicated targets of miR-17-92 and Dlk1-Dio3 miRNAs that were differentially expressed in the microarray data.
- Table S3 (Related to Figure 3). Result of SPIA pathway analysis on the predicated targets of all the differentially up-regulated miRNAs in the microarray data.
- Table S4 (Related to Figure 4) Result of SPIA pathway analysis on all the differentially down-regulated genes in the microarray data.

#### **4. Supplemental Experimental Procedure**

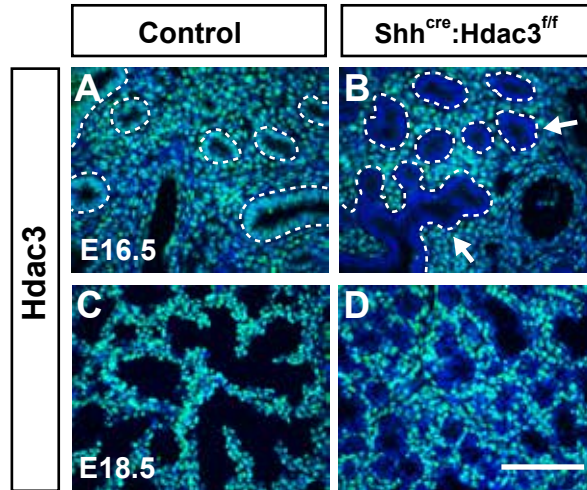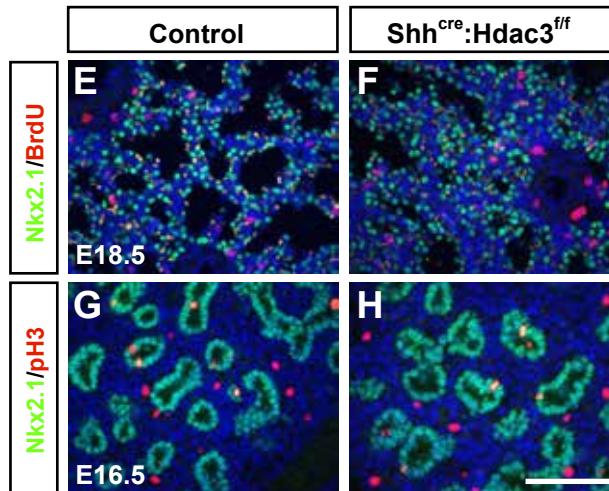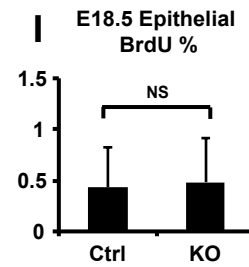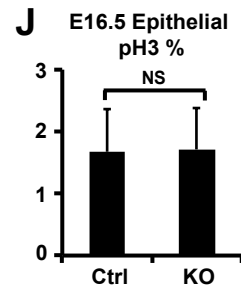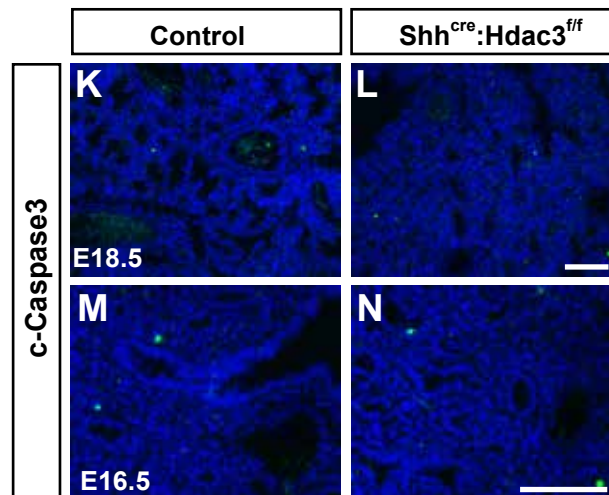

qPCR on Lung Epithelial and Mesenchymal Markers

**A**

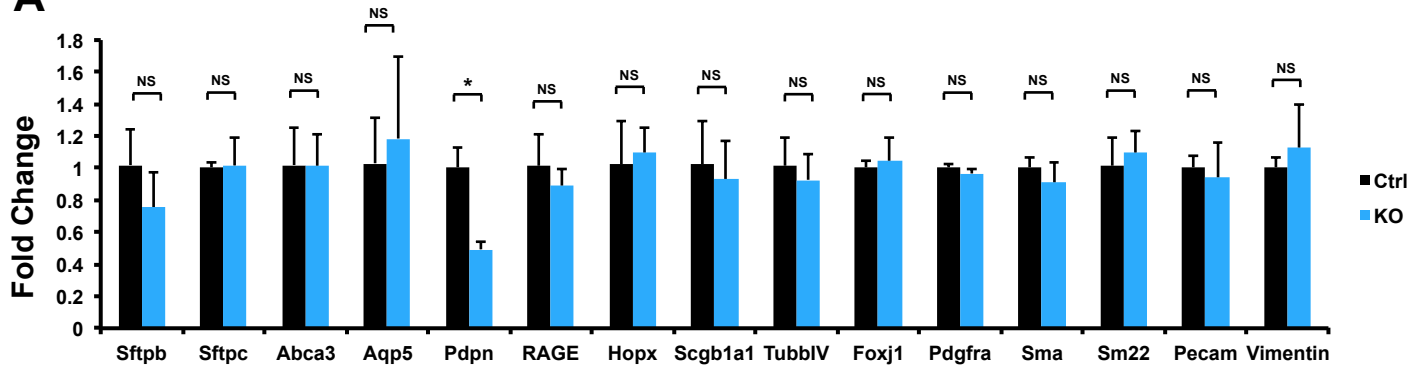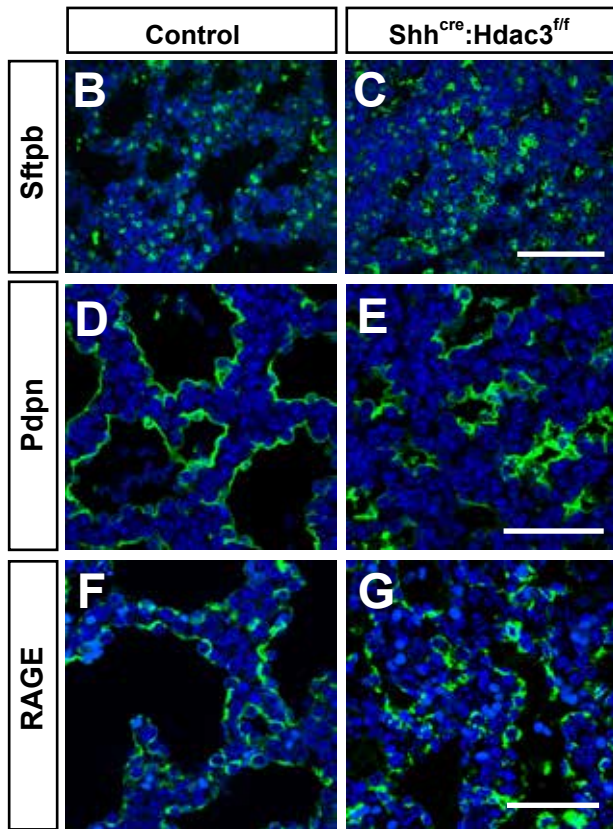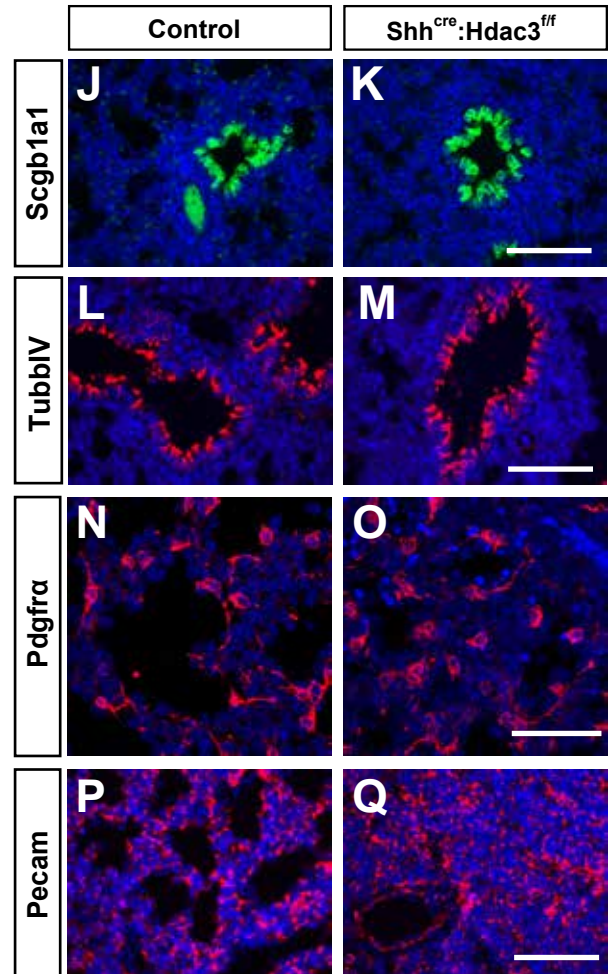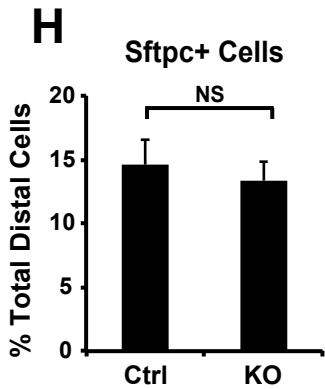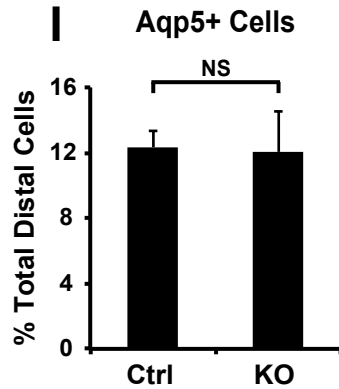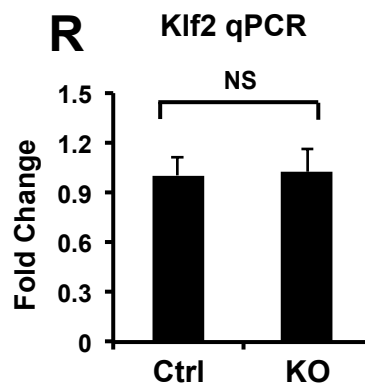

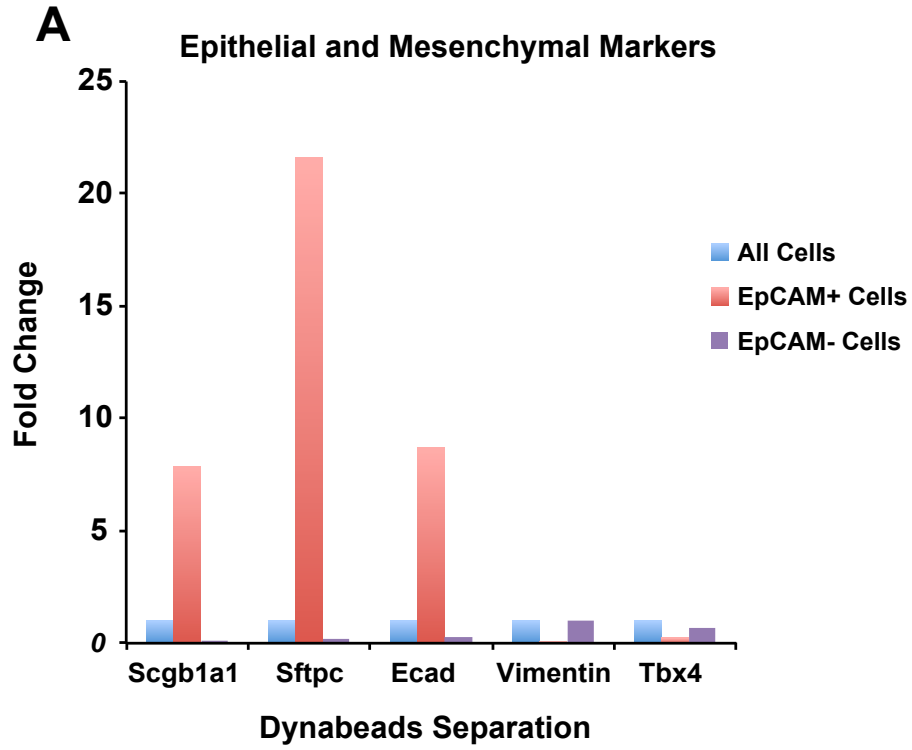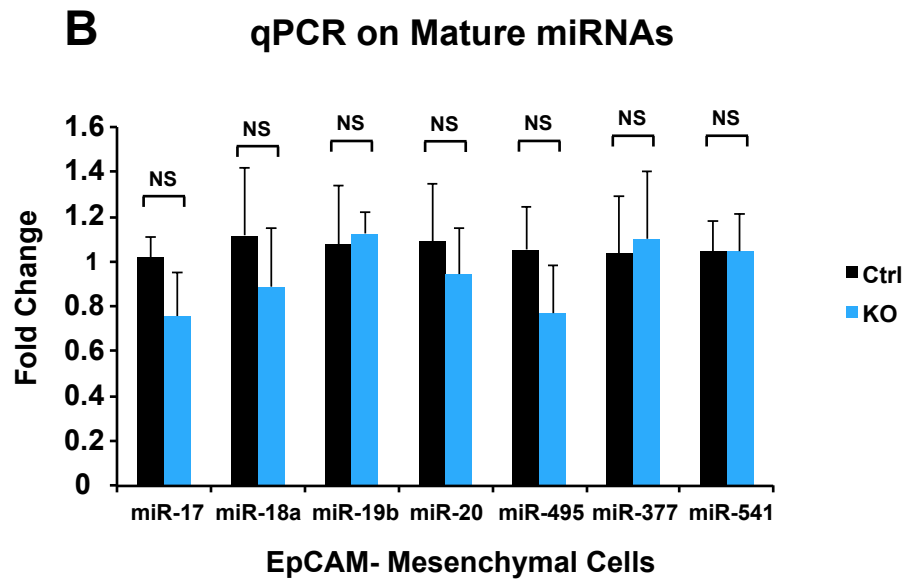

**A** Tgf- $\beta$  Component Genes in E18.5 Mesenchymal Cells

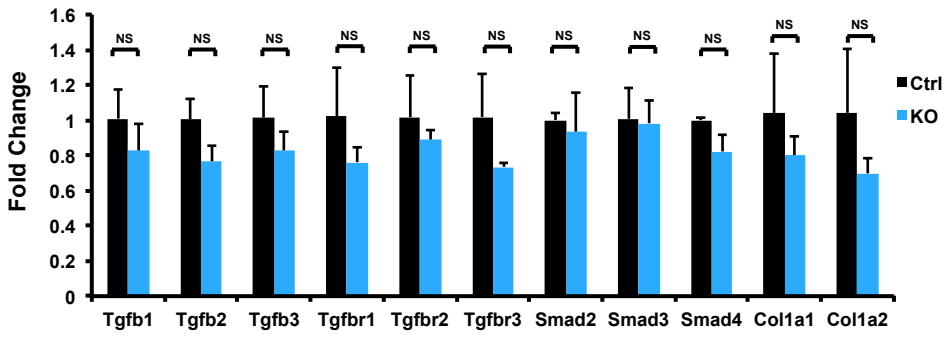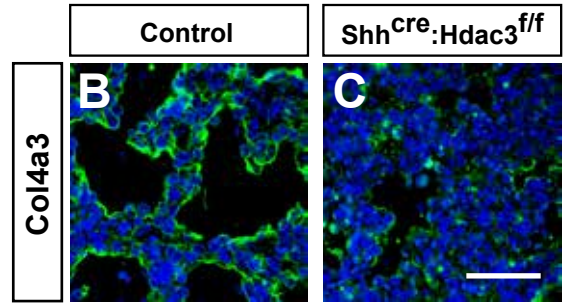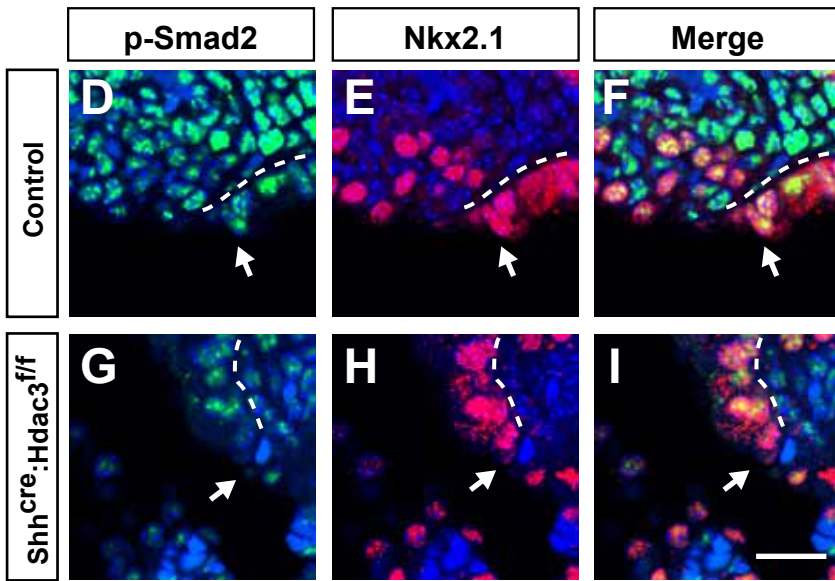

**J** qPCR on ECM Genes in Lung Explants

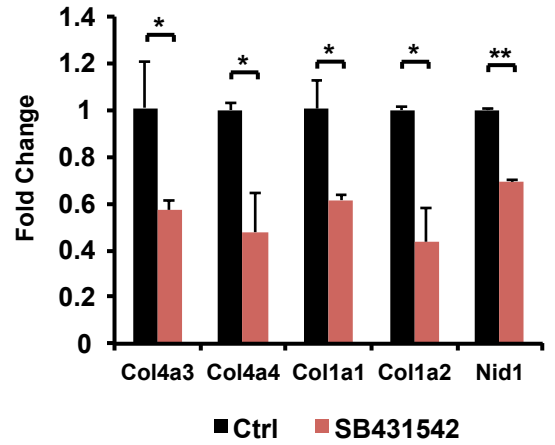

E16.5 Lung Explants 48hr

Control SB431542

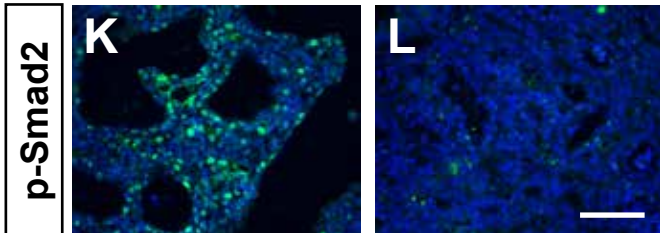

Lung Epithelial Cell Spreading Assay

Control SB431542

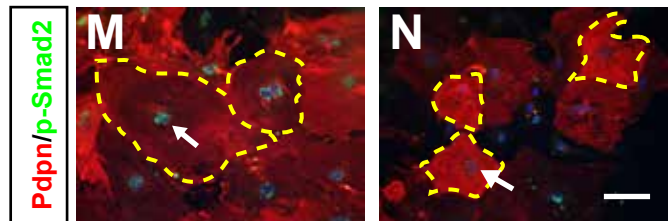

KO

KO+Tgf $\beta$

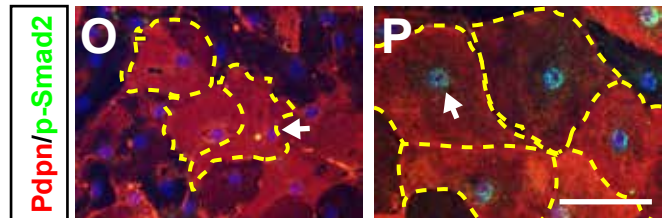

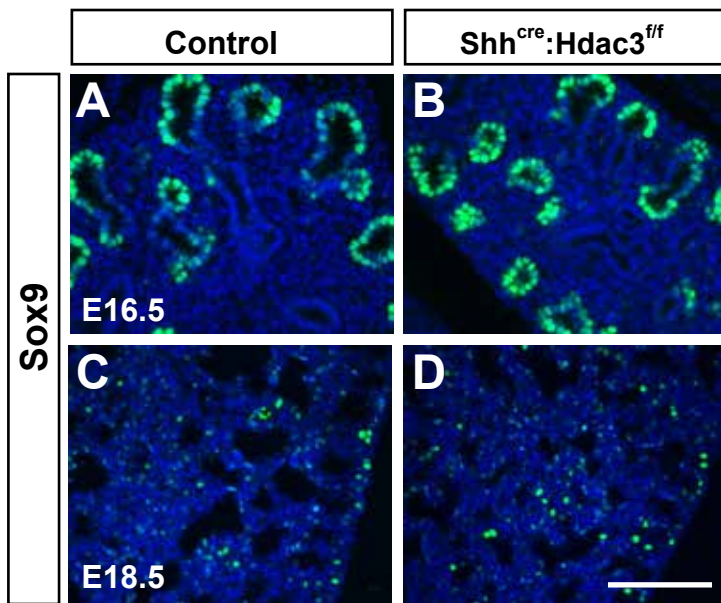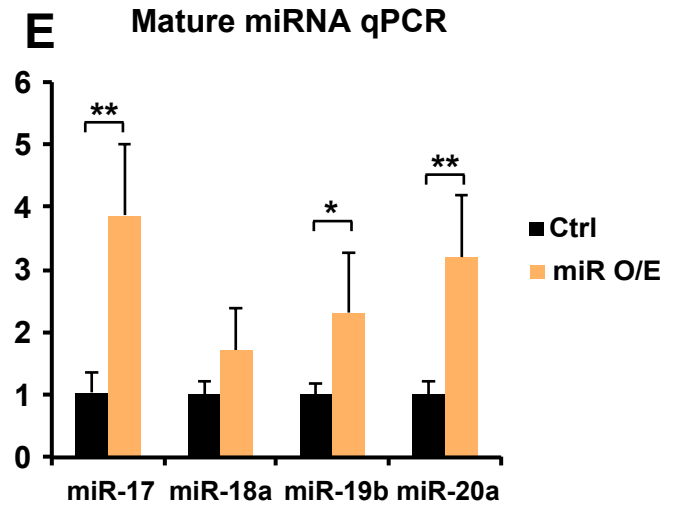

**F Expression of Tgf- $\beta$  and ECM Genes in MLE12 Cells Overexpressing miR17-92**

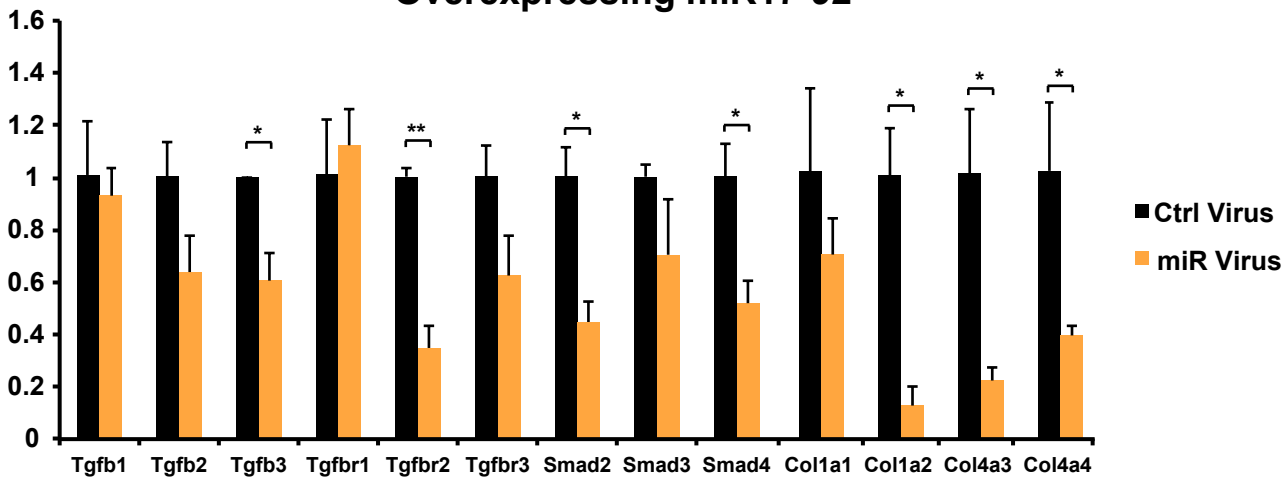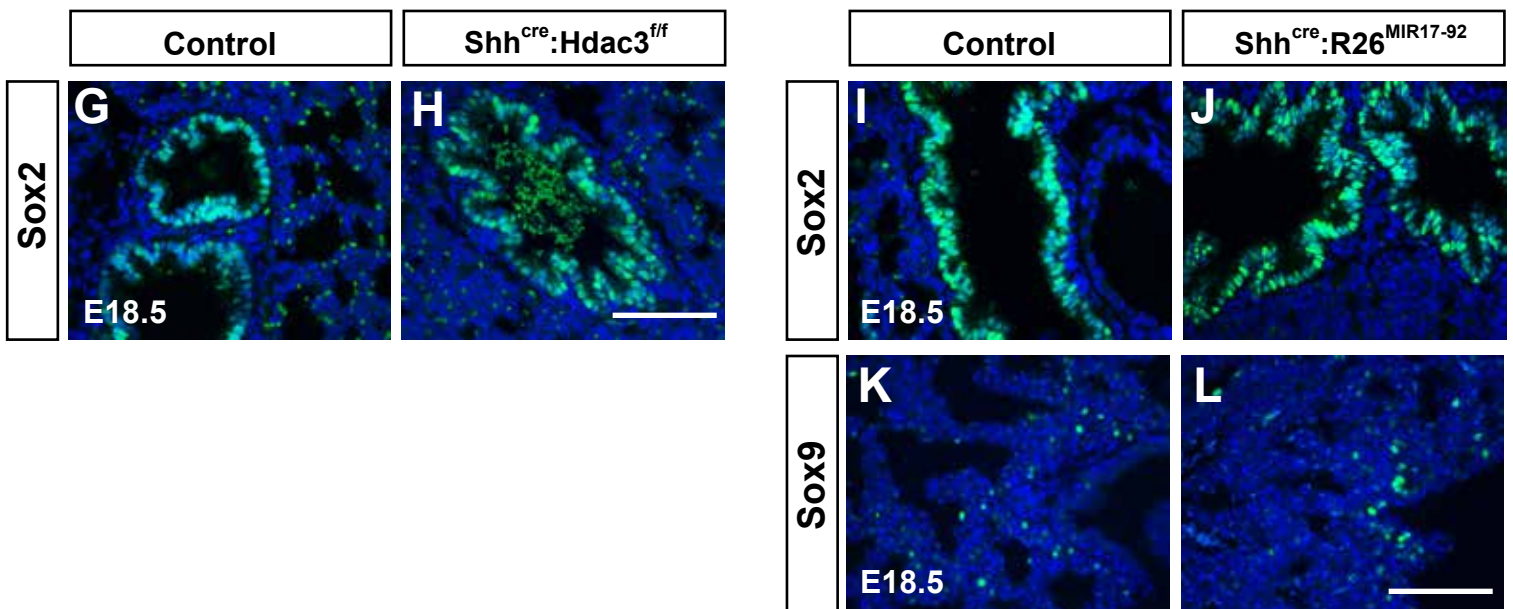

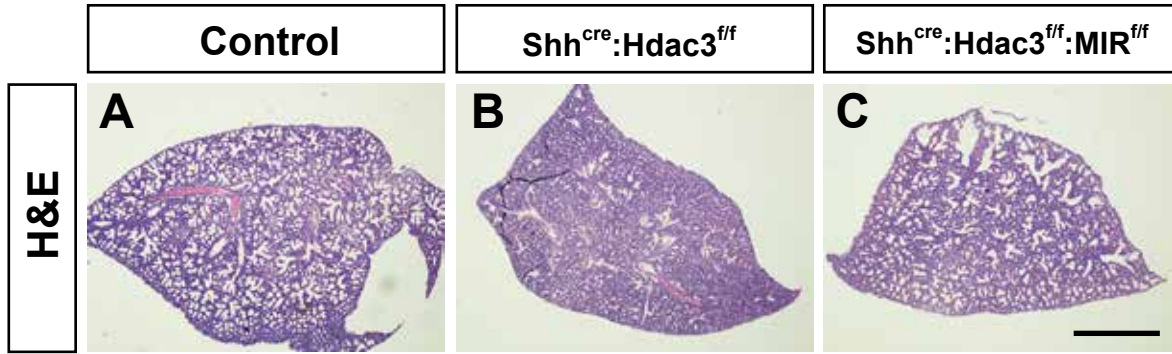



## **SUPPLEMENTAL FIGURE LEGENDS**

### **Figure S1 (Related to Figure 1). Expression pattern of Hdac3 during lung development and assessment of cell proliferation and survival in the *Shh<sup>cre</sup>:Hdac3<sup>ff</sup>* mutant lungs.**

(A-D) Hdac3 is highly expressed in lung epithelium and mesenchyme at both E16.5 and E18.5 (A and C). Hdac3 is efficiently deleted in the epithelial cells of *Shh<sup>cre</sup>:Hdac3<sup>ff</sup>* mutant lungs (arrows). White dotted lines outline the airway epithelium.

(E-J) Assessment of cell proliferation by BrdU incorporation at E18.5 and phospho-histone H3 staining at E16.5 reveals no significant changes in epithelial cell proliferation in the *Shh<sup>cre</sup>:Hdac3<sup>ff</sup>* mutant lungs.

(K-N) Assessment of cell survival by cleaved-Caspase 3 staining shows no significant difference in cell apoptosis in the *Shh<sup>cre</sup>:Hdac3<sup>ff</sup>* mutant lungs.

Ctrl=Control; KO= *Shh<sup>cre</sup>:Hdac3<sup>ff</sup>*. Two tail student's t test: NS=not significant. n=3.

Quantification data are represented as mean  $\pm$  SD. Scale Bars: 100 $\mu$ m.

### **Figure S2 (Related to Figure 2). Examination of cell differentiation marker gene expression in *Shh<sup>cre</sup>:Hdac3<sup>ff</sup>* mutant lungs.**

(A) qPCR analyses on multiple proximal and distal airway epithelial differentiation markers and mesenchymal markers show no significant difference in the *Shh<sup>cre</sup>:Hdac3<sup>ff</sup>* mutant lungs, except Pdpn which is also expressed in the lymphatic endothelial cells and shows a moderate decrease.

(B-I) Immunostaining of AT2 cell marker Sftpb (B and C), AT1 cell marker Pdpn and RAGE (D-G), club cell marker Scgb1a1 (J and K) and ciliated cell marker TubbIV (L and

M) shows no differences in major epithelial lineage commitment in the *Shh<sup>cre</sup>:Hdac3<sup>ff</sup>* lungs.

(H and I) Quantification of the AT2 (Sftpc+) and AT1 (Aqp5+) cell numbers in the distal lung shows no significant alterations of these two epithelial lineages in the *Shh<sup>cre</sup>:Hdac3<sup>ff</sup>* lungs.

(N-Q) Immunostaining of fibroblast marker Pdgfr $\alpha$  and vascular endothelial marker Pecam shows no differences in the mesenchymal cell lineage development in the *Shh<sup>cre</sup>:Hdac3<sup>ff</sup>* mutant lungs.

(R) qPCR analysis shows that Klf2 expression is not significantly changed in the *Shh<sup>cre</sup>:Hdac3<sup>ff</sup>* lungs.

Ctrl=Control; KO= *Shh<sup>cre</sup>:Hdac3<sup>ff</sup>*. Two tail student's t test: \*p<0.05; NS=not significant. n=3. qPCR data are represented as mean  $\pm$  SD. Scale Bars: C, K, M and Q=100 $\mu$ m; E, G and O=50 $\mu$ m.

**Figure S3 (Related to Figure 3). qPCR analysis on isolated primary epithelial cells and the miRNA expression in the mesenchymal cells of *Shh<sup>cre</sup>:Hdac3<sup>ff</sup>* mutant lungs.**

(A) qPCR analysis on several epithelial and mesenchymal markers shows an enrichment of epithelial cell lineage and a depletion of mesenchymal cell lineage in the Dynabeads isolated E18.5 primary lung epithelial cells.

(B) qPCR analysis on mature miRNAs including miR-17-92 and miRNAs in the *Dlk1-Dio3* locus reveals no significant expression difference in the mesenchymal cells of

*Shh<sup>cre</sup>:Hdac3<sup>ff</sup>* mutant lungs. Ctrl=Control; KO= *Shh<sup>cre</sup>:Hdac3<sup>ff</sup>*. Two tail student's t test: NS=not significant. n=3. qPCR data are represented as mean ± SD.

**Figure S4 (Related to Figure 4). qPCR analysis on the Tgf-β pathway in the mesenchyme of *Shh<sup>cre</sup>:Hdac3<sup>ff</sup>* mutant lungs and the effect of SB431542 and Tgf-β on p-Smad2 expression.**

(A) qPCR analysis on multiple components of Tgf-β pathway shows no significant differences in their expression levels in the mesenchyme of *Shh<sup>cre</sup>:Hdac3<sup>ff</sup>* mutant lungs.

(B and C) Immunostaining shows that Col4a3 is significantly down-regulated in the distal region of the *Shh<sup>cre</sup>:Hdac3<sup>ff</sup>* mutant lungs.

(D-I) Co-staining of p-Smad2 and Nkx2.1 shows that p-Smad2 level is decreased at the bronchoalveolar duct junctions *Shh<sup>cre</sup>:Hdac3<sup>ff</sup>* mutant lungs.

(J) Lung explants treated with SB431542 shows reduced expression of several cell-ECM genes.

(K-N) p-Smad2 level is decreased after SB431542 treatment in the lung explant culture and epithelial cell culture.

(O-P) p-Smad2 level is increased after treatment of Tgf-β ligands in the *Shh<sup>cre</sup>:Hdac3<sup>ff</sup>* mutant lung epithelial culture.

Ctrl=Control; KO= *Shh<sup>cre</sup>:Hdac3<sup>ff</sup>*. Two tail student's t test: NS=not significant. n=3.

qPCR data are represented as mean ± SD. Scale bars: I=20μm; C and L=50μm; N and P=100μm.

**Figure S5 (Related to Figure 5). Over-expression of miR-17-92 by the  $R26^{\text{MIR17-92}}$  allele does not affect epithelial progenitor marker expression.**

(A-D) Immunostaining for Sox9 expression shows that distal lung progenitor cells are not altered in  $Shh^{\text{cre}}:Hdac3^{\text{ff}}$  mutant lungs at E16.5 or E18.5.

(E) qPCR analysis shows that miR-17-92 miRNA expression levels are elevated in the  $Shh^{\text{cre}}:R26^{\text{MIR17-92}}$  lung epithelial cells by a similar amount to those of  $Shh^{\text{cre}}:Hdac3^{\text{ff}}$  mutant lungs.

(F) qPCR analysis shows that MLE12 cells infected by lentivirus over-expressing miR-17-92 have a significant reduction in Tgf- $\beta$  pathway components and genes involved in cell-ECM interaction.

(G and H) Proximal epithelial progenitor marker Sox2 expression is not changed in the  $Shh^{\text{cre}}:Hdac3^{\text{ff}}$  mutant lungs.

(I-L) Sox2 and Sox9 expressions are not changed in the  $Shh^{\text{cre}}:R26^{\text{MIR17-92}}$  lungs.

Ctrl=Control; miR O/E=  $Shh^{\text{cre}}:R26^{\text{MIR17-92}}$ . Two tail student's t test: \*p<0.05; \*\*p<0.01; n=3. qPCR data are represented as mean  $\pm$  SD. Scale Bars: 100 $\mu$ m.

**Figure S6 (Related to Figure 6). Loss of epithelial miR-17-92 alleviates the defects of lung sacculation in the  $Shh^{\text{cre}}:Hdac3^{\text{ff}}$  mutant lungs.**

(A-C) Low magnification of H&E staining shows an overall improvement of lung sacculation defects in  $Shh^{\text{cre}}:Hdac3^{\text{ff}}:MIR17-92^{\text{ff}}$  lungs compared to  $Shh^{\text{cre}}:Hdac3^{\text{ff}}$  lungs.

Scale bar=2mm.

**Table S1 (Related to Figure 3). A list of all the differentially expressed genes in the microarray comparing control lungs and *Shh*<sup>cre</sup>:*Hdac3*<sup>fl/fl</sup> mutant lungs at E18.5.**

**Table S2 (Related to Figure 3). Result of SPIA pathway analysis on the common predicated targets of miR-17-92 and Dlk1-Dio3 miRNAs that were differentially expressed in the microarray data.**

**Table S3 (Related to Figure 3). Result of SPIA pathway analysis on the predicated targets of all the differentially up-regulated miRNAs in the microarray data.**

**Table S4 (Related to Figure 4) Result of SPIA pathway analysis on all the differentially down-regulated genes in the microarray data.**



## **SUPPLEMENTAL MOVIES**

**Movie S1 (Related to Figure 1). 3D reconstruction of Aqp5 whole mount staining showing the distal saccular region of an E18.5 control lung.**

**Movie S2 (Related to Figure 1). 3D reconstruction of Aqp5 whole mount staining showing the distal saccular region of an E18.5 *Shh<sup>cre</sup>:Hdac3<sup>ff</sup>* mutant lung.**

## **SUPPLEMENTAL EXPERIMENTAL PROCEDURE**

We used the following primers to perform qPCR analysis in our studies (sequences

listed from 5' to 3'):

| <b>Gene</b> | <b>Forward</b>             | <b>Reverse</b>           |
|-------------|----------------------------|--------------------------|
| Gapdh       | AAATGGTGAAGGTCGGTGTGAACG   | ATCTCCACTTTGCCACTGC      |
| Scgb1a1     | ATACCCTCCCACAAGAGACCAGGATA | ACACAGGGCAGTGACAAGGCTTTA |
| Foxj1       | AGTGGATCACGGACAACCTTCTGCT  | TTCTCCCGAGGCACTTTGATGAAG |
| TubblV      | AACCCGGCACCATGGACTCTGT     | TGCCTGCTCCGGATTGACCAAATA |
| Aqp5        | ATGAACCCAGCCCGATCTTT       | ACGATCGGTCCTACCCAGAAG    |
| Pdpn        | AGGTACAGGAGACGGCATGGT      | CCAGAGGTGCCTTGCCAGTA     |
| Sftpc       | ACCCTGTGTGGAGAGCTACCA      | TTTGCGGAGGGTCTTTCT       |
| Sftpb       | TAGCCCTCTGCAGTGCTTCCAAA    | AGCTGGGACATACAGACTGACACA |
| Abca3       | TTCATCACCTGATGGCGGTGAAC    | ACGCATGATGGCTTTGTCTACAGC |
| Tbx4        | AAGGTGGGGCTGCATGAGAAGGA    | GAACATCCTCCTGCCGGCCTT    |
| Vimentin    | TGACCTTGAACGGAAAGTGG       | GGACATGCTGTTCTGAATCT     |
| Ecad        | CCGTCCTGCCAATCCTGATGA      | ACTGCCCTCGTAATCGAACACCAA |
| Tgfb1       | CTGAACCAAGGAGACGGAATAC     | GGGCTGATCCCGTTGATTT      |
| Tgfb2       | GTACCTTCGTGCCGTCTAATAA     | GTGCCATCAATACCTGCAAATC   |
| Tgfb3       | CGCTACATAGGTGGCAAGAA       | CAAGTTGGACTCTCTCCTCAAC   |
| Tgfb1       | GTTCCGAGAGGCAGAGATTTAT     | CGTCCATGTCCCATTGTCTT     |
| Tgfb2       | GCTTCTCCCAAGTGTGTCAT       | GACTGCTGGTGGTGTATTCTT    |
| Tgfb3       | CTGGTGTGGCATGTGAAGA        | TCCTCTGTTTCTGCTGTCAAG    |
| Smad2       | GATGACTACACCCACTCCATTC     | ATATCCAGGTGGTGGTGTTC     |
| Smad3       | CCTGAGTGAAGATGGAGAAACC     | CTGGCTGTAGGTCCAAGTTATT   |
| Smad4       | GCAGAGTAATGCTCCAAGTATGT    | CGAATGTCCTTCAGTGGGTAAG   |
| Col1a1      | TGACCGATGGATTCCCGTTC       | GCAGTGATAGGTGATGTTCTGG   |
| Col1a2      | GATGTTGAACTTGTTGCTGAGG     | CAATGATTGTCTTGCCCCATTC   |
| Col4a3      | CTCTCGAACCCCTATATTAGCAGATG | ACGGAGGGATAGCAGTAGTT     |
| Col4a4      | CCCTGGATCAGATGTGATATACT    | CTCCTTTGGCTCCTCTTCTT     |
| Itga7       | GGATTCCGAGGTGCGATTT        | ACATCCAGATTGAAGGCGATAG   |
| Itgb1       | CTCCGGCCAGAAGACATTAC       | GGGTAATCTTCAGCCCTCTTG    |
| Nidogen 1   | GCACTCCTATGTGGTGTGAA       | ATCCGATGATGCCTCCAATG     |
| Nidogen 2   | CACCGAGGACAGTTTCCATTAC     | TCAATTCTGCTGTGGCCTTC     |
| Pdgfra      | TGAGGGAGAGAAACAAACGGAGGA   | AGCTCCTGAGACCTTCTCCTTCTA |
| SMA         | ATTGTGCTGGACTCTGGAGATGGT   | TGATGTCACGGACAATCTCACGCT |
| SM22        | TCTAATGGCTTTGGGCAGTTTGGC   | TTTGAAGGCCAATGACGTGCTTCC |
| CD31        | ATCCTCAGGCTCGGGTCTT        | CCATGCACCTTCACCTCGTA     |

We used the following primers for ChIP assays in our studies:

| <b>Gene</b>          | <b>Forward</b>           | <b>Reverse</b>           |
|----------------------|--------------------------|--------------------------|
| miR17-92             | GGAGGTCGGAAGTACTTTGTTT   | AAGGACCATGTGGGTGAATG     |
| Mirg                 | GGTGACAGGTTGTATCTTCT     | CCGATTCTGACGGACTATCTTG   |
| Intergenic<br>Region | TGGCGGGTTTATGCTAAGTGAGGA | ACAGGTGTTGGAGGAAACTGTCCA |
